# Supplementary material for: ODORANT1 targets multiple metabolic networks in petunia flowers
Source: PubMed Central journal article supplement — Plant J. 2021 Dec 27;109(5):1134–51. doi: 10.1111/tpj.15618 (PMC9306810; doi:10.1111/tpj.15618), 2021-12-27
Supplement: TPJ-109-1134-s002.pdf [file TPJ-109-1134-s002.pdf]

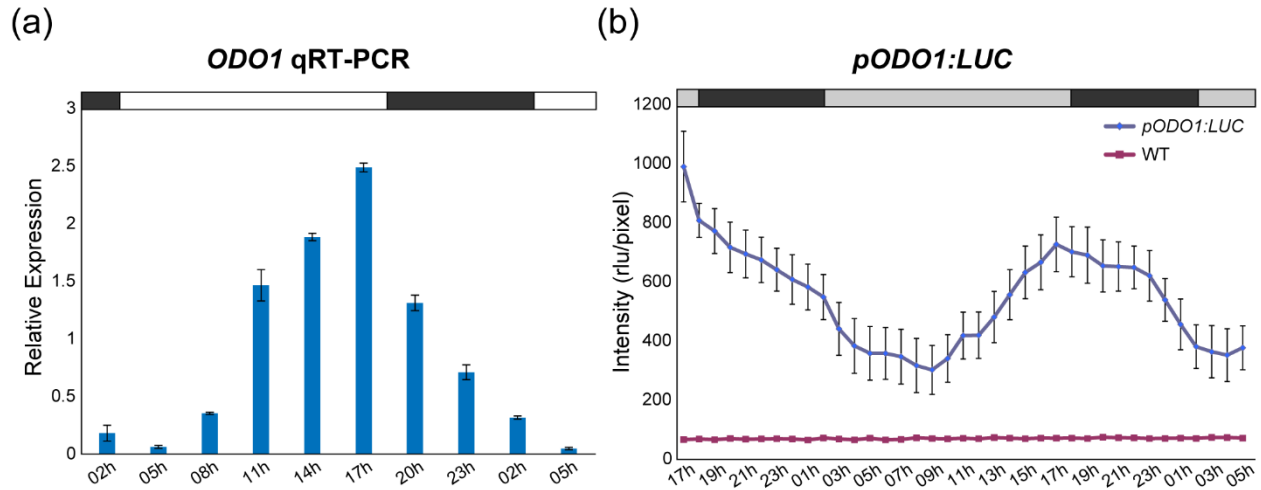

**Figure S1. Diurnal fluctuation of *ODO1* transcriptional activity.** (a) Corolla tissue from two-day-old W115 wild-type flowers was collected every three hours for RNA extraction and expression of *ODO1* was measured by qRT-PCR. Petunia housekeeping reference gene *FLORAL BINDING PROTEIN 1* (*FBPI*) was used for normalization (Angenent et al., 1992; Shaipulah et al., 2016). White and black bars represent periods of light and dark, respectively. Error bars represent standard error of the mean (n=3). Transcript levels were determined to have significantly rhythmic pattern at  $p < 0.001$  (ANOVA followed by Tukey's post hoc analysis). (b) Measurement of *ODO1* promoter luciferase activity in *pODO1:LUC* petunia flowers (Movie 1). Pixel intensity was measured using the MetaVueTM Imaging System (Universal Imaging Corporation, USA). Luciferase activity was determined by collection at hourly intervals of luminescence counts per flower to determine intensity in relative light units per pixel (rlu/pixel). Image collection was performed in constant dark; grey and black bars represent light and dark periods respectively to which plants were acclimated. Diamond markers represent the mean intensity from *pODO1:LUC* flowers with error bars representing standard error of the mean (n=4), while square markers show background levels measured from a wild-type flower (n=1). Luciferase activity in *pODO1:LUC* flowers was determined to have a significantly rhythmic pattern at  $p < 0.05$  (ANOVA followed by Tukey's post hoc analysis). The experiment was repeated twice with similar results.

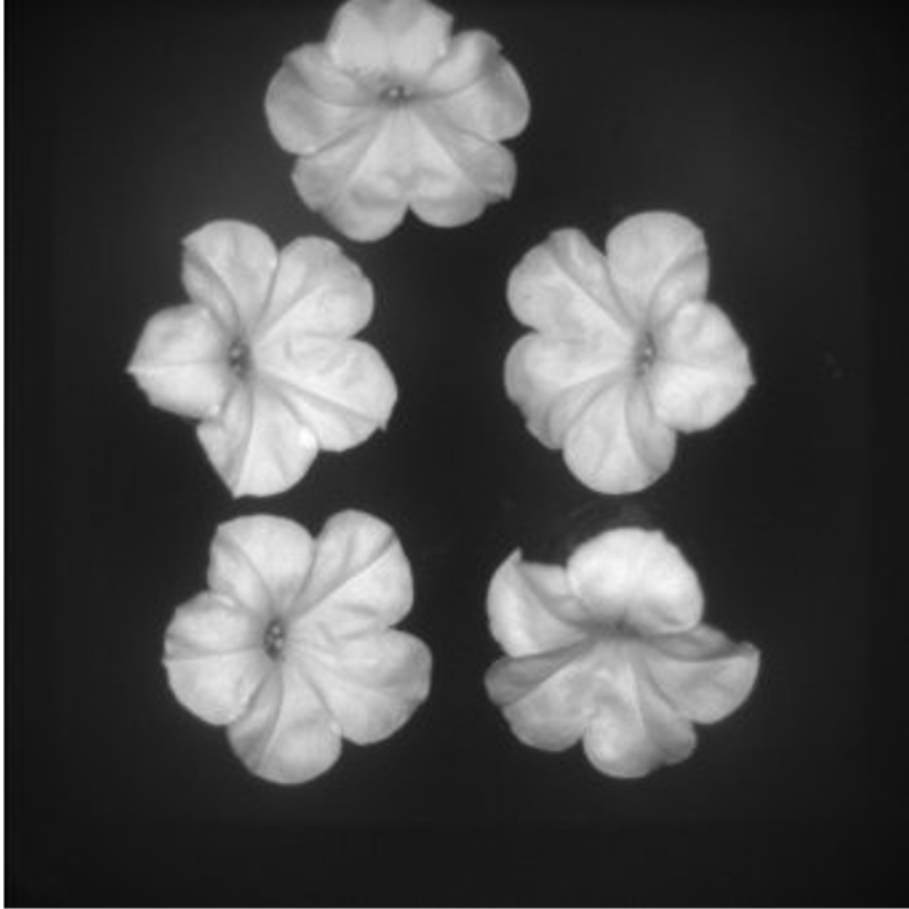

**Figure S2. Setup of detached flowers for luciferase imaging.** Depiction of the arrangement of four *pODO1:LUC* flowers (bottom) with one wild-type flower (top) for imaging in Movie 1.

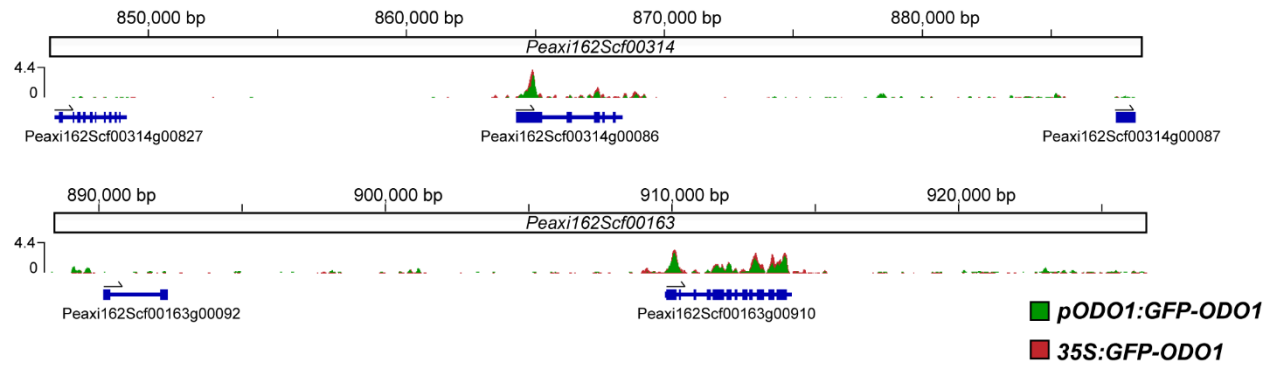

**Figure S3. ChIP-Seq signal in gene space surrounding example ODO1 targets.** ChIP-seq signals at *4CLA* (Peaxi162Scf00314g00086) and *CIMSI* (Peaxi162Scf00163g00910) with surrounding upstream and downstream regions. The Y axis represents the sequencing depth covered by ChIP-seq in fragments per million, after normalization to the total number of unique aligned fragments in each library. Ruler markings indicate location of ChIP signal along the corresponding petunia scaffolds, with annotated gene features below (thicker bar sections for coding regions, thinner sections for introns and untranslated regions).

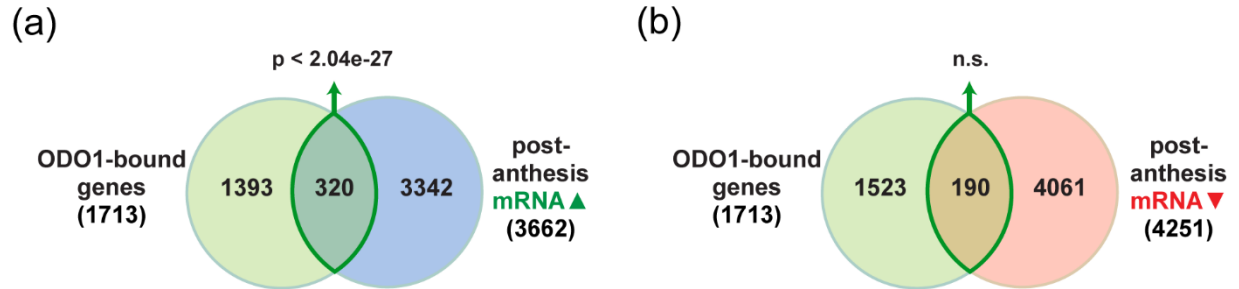

**Figure S4. Developmental regulation of ODO1-bound genes.** ODO1-bound genes are significantly overlapped with genes that are up-regulated (a) at day 2 relative to day 0 post-anthesis (Patrick et al., 2021), but not with genes that are down-regulated (b) at day 2 relative to day 0 post-anthesis (Patrick et al., 2021). The hypergeometric  $p$  value for the overlap between gene sets are shown. n.s.= not significant.

(a)

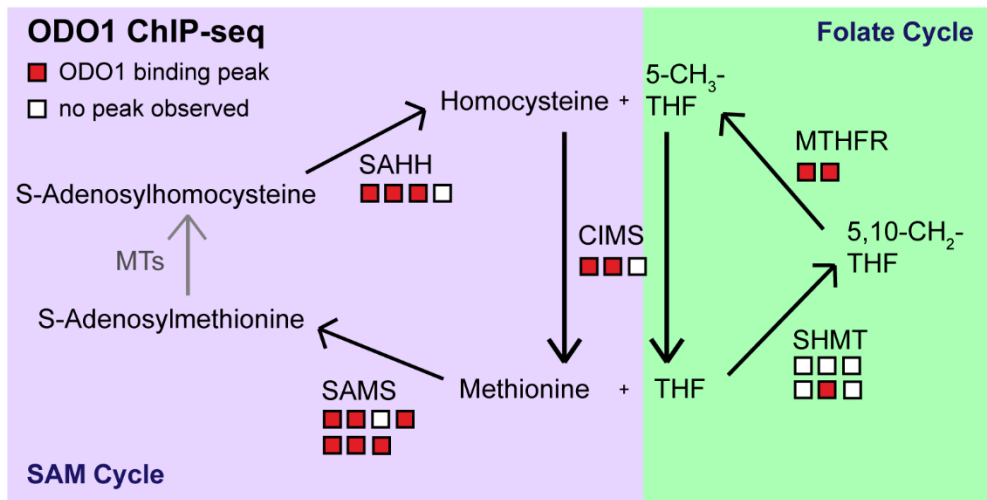

(b)

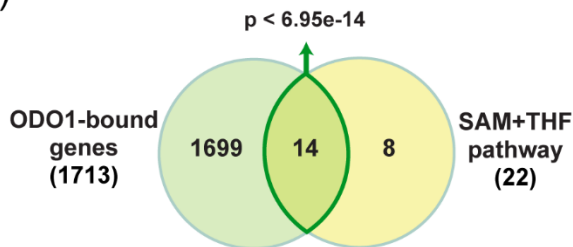

**Figure S5. ODO1 binding of SAM cycle genes determined by ChIP-seq.** (a) Methionine pathway with SAM and folate cycle genes identified in petunia (see also Table S2). The genes bound by ODO1 are indicated by red squares. (b) Overlap between ODO1-bound genes and SAM/THF genes with a  $p$  value representing the significance of the observed overlap determined by hypergeometric distribution against the whole genome as background. Abbreviations: CIMS, cobalamin-independent methionine synthase; MTHFR, methylenetetrahydrofolate reductase; MTs, methyltransferases; ODO1, ODORANT1; SAHH, S-adenosyl-L-homocysteine hydrolase; SAMS, S-adenosylmethionine synthetase; SHMT, serine hydroxymethyltransferase; THF, tetrahydrofolate

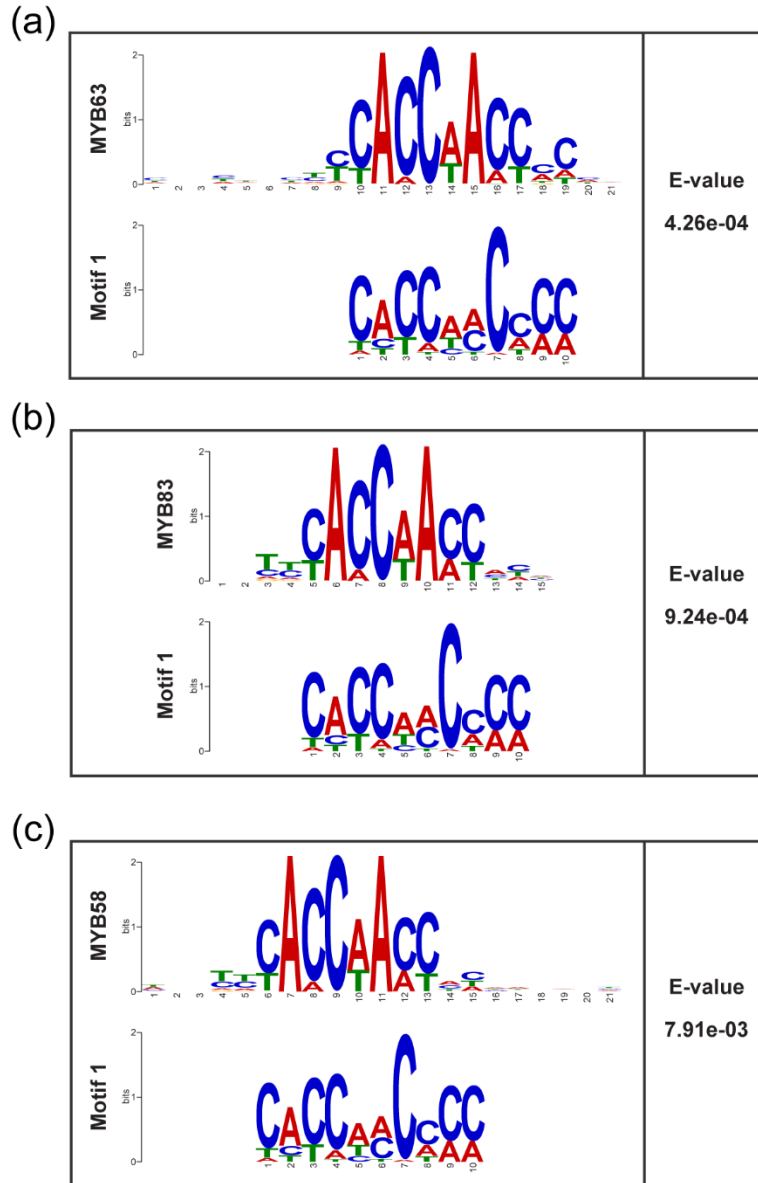

**Figure S6. Comparison between the putative ODO1 binding motif with previously reported binding motifs of transcription factors in Arabidopsis.** The putative binding motif of ODO1 (Motif 1, Figure 5a) was queried against the Arabidopsis DAP-Seq database (O'Malley et al., 2016) using Tomtom (Gupta et al., 2007). Top three matches by lowest E-value shown, all relating to MYB transcription factors.

**Motif 1B in ODO1-bound FVBP pathway gene promoters**

| shikimate/phe biosynthesis |                                                         | general phenylpropanoid |                                                                                                                | monolignol biosynthesis |                                                                        |            |                                          |                 |                                          |
|----------------------------|---------------------------------------------------------|-------------------------|----------------------------------------------------------------------------------------------------------------|-------------------------|------------------------------------------------------------------------|------------|------------------------------------------|-----------------|------------------------------------------|
| gene                       | motif                                                   | gene                    | motif                                                                                                          | gene                    | motif                                                                  |            |                                          |                 |                                          |
| <i>DHD-SDH3</i>            | CACCAACCCC,<br>CAACTACCCC,<br>CCCCATCCAC,<br>CAACTTCCTC | <i>PALa</i>             | CCCCTCCCCC,<br>CAACTACCAC,<br>TACCAACCCT                                                                       | <i>HCT1</i>             | CACCTACCAC,<br>CACCTTACCC                                              |            |                                          |                 |                                          |
| <i>SK</i>                  | CCCCCCCCCC,<br>CCCCTACCTA                               | <i>PALb</i>             | CACCAACCCC (x2),<br>CCCCACCCTC,<br>CACCTACCAA,<br>CACCTACCAT,<br>CAACAACCCA (x2),<br>CCCCTAGCCC,<br>CACCAAACCT | <i>HCT2</i>             | CACCTACCAC,<br>CCCCTTCCAT                                              |            |                                          |                 |                                          |
| <i>EPSPS1</i>              | CACCAACTAC,<br>CACCAACAAC                               |                         |                                                                                                                | <i>C3H</i>              | CACCAACTCC,<br>CAACTACCAC,<br>CACCAACCAA,<br>CCCCAACTCT,<br>CCCCTTCCAT |            |                                          |                 |                                          |
| <i>DAHP1</i>               | CACCTACCTT                                              |                         |                                                                                                                |                         |                                                                        |            |                                          |                 |                                          |
| <i>CS</i>                  | CACCTACCCC,<br>CCCCTCACCC                               |                         |                                                                                                                |                         |                                                                        |            |                                          |                 |                                          |
| <i>ADT1</i>                | CACCTACCCC,<br>CCACCACCAC                               | <i>PALc</i>             | CACCAACCCC,<br>CAACAACCAC,<br>CAACAACCCA                                                                       | <i>CCoAOMT1</i>         | CACCAACAAC                                                             |            |                                          |                 |                                          |
| <i>ADT3</i>                | CACCTACCAC                                              | <i>C4Ha</i>             | CACCAACTCC,<br>TACCTACCCC,<br>CACCTACCTA,<br>CACCATCCTA                                                        | <i>CCoAOMT3</i>         | CACCTACCAA                                                             |            |                                          |                 |                                          |
|                            |                                                         |                         |                                                                                                                | <i>4CLa</i>             | CACCAACCAC,<br>CCCCATCCCT                                              | <i>CAD</i> | CCCCACCCCC,<br>CACCAACCTC,<br>CCCCCCCCCC |                 |                                          |
|                            |                                                         |                         |                                                                                                                |                         |                                                                        |            |                                          | <i>4CLd</i>     | CACCAACTCC                               |
|                            |                                                         |                         |                                                                                                                |                         |                                                                        |            |                                          | <i>4CL-like</i> | CAACTACTCC,<br>CACCTTCCAT,<br>CACCCACGCC |
| volatile benzenoid         |                                                         |                         |                                                                                                                |                         |                                                                        |            |                                          |                 |                                          |
| gene                       | motif                                                   |                         |                                                                                                                |                         |                                                                        |            |                                          |                 |                                          |
| <i>CNL3</i>                | CCACTTCCCC                                              |                         |                                                                                                                |                         |                                                                        |            |                                          |                 |                                          |
| <i>CHD1</i>                | TCCCAACCCC,<br>CCCCACACAC                               |                         |                                                                                                                |                         |                                                                        |            |                                          |                 |                                          |
| <i>BPBT2</i>               | CAACAACCTAC                                             |                         |                                                                                                                |                         |                                                                        |            |                                          |                 |                                          |

**Figure S7. Motif 1B occurrences within promoters of ODO1-bound FVBP genes.** Sequence matches to the predicted ODO1 binding motif within 500bp promoter of FVBP genes (Figure 5c) with  $p$  value  $< 1.0e-04$  as determined by MEME (Bailey et al., 2009) are shown. Abbreviations: 4CL, 4-coumaryl-CoA ligase; ADT, arogenate dehydratase; BPBT, benzoyl-CoA:benzylalcohol/phenylethanol benzoyltransferase; C3H, coumarate 3-hydroxylase; C4H, cinnamate 4-hydroxylase; CAD, cinnamyl alcohol dehydrogenase; CCoAOMT, caffeoyl-CoA O-methyltransferase; CHD, cinnamoyl-CoA hydratase-dehydrogenase; CNL, cinnamoyl-CoA ligase; CS, chorismate synthase; DAHP, 3-deoxy-D-*arabino*-heptulosonate 7-phosphate synthase; DHD-SDH, 3-dehydroquinatase dehydratase and shikimate dehydrogenase; EPSPS, 5-*enol*pyruvylshikimate 3-phosphate; HCT, hydroxycinnamoyl-CoA:shikimate/quinatase hydroxycinnamoyl transferase; ODO1, ODORANT1; PAL, phenylalanine ammonia lyase; SK, shikimate kinase.

>pPALc

ccgagctcgcgggccgcCTC**CAACAACCC**AAACAACCTCACAAATCCCATCCCAATTC**CACCAACCCC**CAAAATATTGT  
TTCTTTATTTTGTAAACAAAATAGATAAAATAAACCCATGTTACATGGAATACCCACGTCATTCTCAAATCTCAACCG  
TTTAATAAAATTTAAATCAAGGGACAAGATTTATTTTC**CAACAACCAC**CATTTAGCCCTCCCTATTATTCTTTACCT  
ACCAACATTTGTGTTCCATCCCCTCTATTTATACACCACATCTCCTATCTACCACAtctagacc

>pEPSPS1

ccgagctcgcgggccgcCGAATTAGTCGAGCCCCAAATAATATATACGTCGGGTGGAAAACATAAAATGTTTGACAA  
AAATGTCAAATTAATATATCAATCTGCAACAACCTTTTCACCTTGAGAACACAGCTGGAATTTTTTACAAAG**GTAGT**  
**TGGTGA**AGCTAGTCAGCGAATCCCATTACCTTCCACTCTACCTAACCCCTT**CACCAACAAC**AAATTTCTGTAATTT  
AAAAACTAGCCAAAAAAGAAGCTCTCTTTTACAAAGAGCCAAAGACTCtctagacc

>mutpPALc

ccgagctcgcgggccgcCTC**CAGgAAggCA**ACAACCTCACAAATCCCATCCCAATTC**CAGgAAggCC**CAAAATATTGT  
TTCTTTATTTTGTAAACAAAATAGATAAAATAAACCCATGTTACATGGAATACCCACGTCATTCTCAAATCTCAACCG  
TTTAATAAAATTTAAATCAAGGGACAAGATTTATTTTC**CAGgAAggAC**CATTTAGCCCTCCCTATTATTCTTTACCT  
ACCAACATTTGTGTTCCATCCCCTCTATTTATACACCACATCTCCTATCTACCACAtctagacc

>mutpEPSPS1

ccgagctcgcgggccgcCGAATTAGTCGAGCCCCAAATAATATATACGTCGGGTGGAAAACATAAAATGTTTGACAA  
AAATGTCAAATTAATATATCAATCTGCAACAACCTTTTCACCTTGAGAACACAGCTGGAATTTTTTACAAAG**GTcct**  
**TcctGA**AGCTAGTCAGCGAATCCCATTACCTTCCACTCTACCTAACCCCTT**CAGgAAggAC**AAATTTCTGTAATTT  
AAAAACTAGCCAAAAAAGAAGCTCTCTTTTACAAAGAGCCAAAGACTCtctagacc

**Figure S8. Synthetic promoter constructs.** Restriction sites are underlined and ODO1 binding sites are bold. Mutated nucleotides are displayed in lower case and bold.



**Table S1.** Significantly enriched GO terms among ODO1-bound genes determined by ChIP-seq

| <b>GO term</b> | <b>description</b>                                  | <b>fold enrichment</b> | <b>FDR corrected <i>p</i> value</b> |
|----------------|-----------------------------------------------------|------------------------|-------------------------------------|
| GO:0006556     | S-adenosylmethionine biosynthetic process           | 17.09                  | 8.28E-06                            |
| GO:0015690     | aluminum cation transport                           | 14.24                  | 0.000239                            |
| GO:0006730     | one-carbon metabolic process                        | 9.20                   | 1.90E-07                            |
| GO:1901141     | regulation of lignin biosynthetic process           | 9.20                   | 0.000521                            |
| GO:0009423     | chorismate biosynthetic process                     | 9.06                   | 0.001772                            |
| GO:2000762     | regulation of phenylpropanoid metabolic process     | 8.55                   | 0.00069                             |
| GO:0009086     | methionine biosynthetic process                     | 7.18                   | 0.000101                            |
| GO:0016441     | posttranscriptional gene silencing                  | 6.65                   | 0.000856                            |
| GO:0009073     | aromatic amino acid family biosynthetic process     | 6.23                   | 0.01131                             |
| GO:0009819     | drought recovery                                    | 5.86                   | 0.01317                             |
| GO:0009698     | phenylpropanoid metabolic process                   | 4.13                   | 0.02411                             |
| GO:0019760     | glucosinolate metabolic process                     | 4.11                   | 0.000378                            |
| GO:0006520     | cellular amino acid metabolic process               | 3.40                   | 0.02584                             |
| GO:0090351     | seedling development                                | 3.32                   | 0.04717                             |
| GO:0009269     | response to desiccation                             | 3.32                   | 0.04717                             |
| GO:0010218     | response to far red light                           | 2.74                   | 0.01951                             |
| GO:0009646     | response to absence of light                        | 2.70                   | 0.04841                             |
| GO:0007623     | circadian rhythm                                    | 2.38                   | 0.02412                             |
| GO:0009809     | lignin biosynthetic process                         | 2.35                   | 0.01384                             |
| GO:0009740     | gibberellic acid mediated signaling pathway         | 2.22                   | 0.02412                             |
| GO:0010200     | response to chitin                                  | 2.04                   | 0.0154                              |
| GO:0080167     | response to karrikin                                | 1.93                   | 0.02412                             |
| GO:0009611     | response to wounding                                | 1.90                   | 0.002136                            |
| GO:0045892     | negative regulation of transcription, DNA-templated | 1.88                   | 0.02439                             |
| GO:0009414     | response to water deprivation                       | 1.88                   | 0.00069                             |
| GO:0006508     | proteolysis                                         | 1.61                   | 0.02536                             |
| GO:0009737     | response to abscisic acid                           | 1.57                   | 0.012                               |
| GO:0046686     | response to cadmium ion                             | 1.56                   | 0.02814                             |
| GO:0009651     | response to salt stress                             | 1.40                   | 0.04055                             |

**Table S2.** *P. axillaris* genes involved in SAM and folate cycle determined by BLAST against Arabidopsis whole gene set. E-Value: Expect value for sequence match relative to chance.

| <b>Gene ID</b>         | <b>Name</b> | <b><i>A. thaliana</i> BLAST Homology</b> | <b>E Value</b> |
|------------------------|-------------|------------------------------------------|----------------|
| Peaxil62Scf00163g00910 | CIMS1       | AT5G17920                                | 0              |
| Peaxil62Scf00163g01014 | CIMS2       | AT5G17920                                | 0              |
| Peaxil62Scf00342g00928 | CIMS3       | AT5G17920                                | 0              |
| Peaxil62Scf00668g00049 | SAMS1a      | AT1G02500                                | 0              |
| Peaxil62Scf00357g00318 | SAMS1b      | AT1G02500                                | 0              |
| Peaxil62Scf00164g00055 | SAMS1c      | AT1G02500                                | 0              |
| Peaxil62Scf01081g00002 | SAMS3a      | AT2G36880                                | 0              |
| Peaxil62Scf00578g00014 | SAMS3b      | AT2G36880                                | 0              |
| Peaxil62Scf00311g00131 | SAMS3c      | AT2G36880                                | 0              |
| Peaxil62Scf00071g00324 | SAMS4       | AT3G17390                                | 0              |
| Peaxil62Scf00047g00011 | SAHH1       | AT4G13940                                | 0              |
| Peaxil62Scf00423g00057 | SAHH2       | AT4G13940                                | 0              |
| Peaxil62Scf00652g00015 | SAHH3       | AT4G13940                                | 0              |
| Peaxil62Scf00089g00930 | SAHH4       | AT4G13940                                | 0              |
| Peaxil62Scf00943g00418 | SHM1        | AT4G37930                                | 0              |
| Peaxil62Scf00481g00018 | SHM2        | AT5G26780                                | 0              |
| Peaxil62Scf00436g00824 | SHM3a       | AT4G32520                                | 0              |
| Peaxil62Scf00064g01624 | SHM3b       | AT4G32520                                | 0              |
| Peaxil62Scf00423g00512 | SHM4a       | AT4G13930                                | 0              |
| Peaxil62Scf00652g00013 | SHM4b       | AT4G13930                                | 0              |
| Peaxil62Scf00344g00056 | MTHFR1      | AT2G44160                                | 0              |
| Peaxil62Scf00156g00015 | MTHFR2      | AT2G44160                                | 0              |

**Table S3.** Significantly enriched GO terms for genes down-regulated in *odoli*

| <b>GO term</b> | <b>description</b>                                     | <b>fold enrichment</b> | <b>FDR corrected <i>p</i> value</b> |
|----------------|--------------------------------------------------------|------------------------|-------------------------------------|
| GO:0046654     | tetrahydrofolate biosynthetic process                  | 13.76                  | 0.01938                             |
| GO:0009645     | response to low light intensity stimulus               | 11.47                  | 0.00677                             |
| GO:0009769     | photosynthesis, light harvesting in photosystem II     | 11.47                  | 0.02416                             |
| GO:0009768     | photosynthesis, light harvesting in photosystem I      | 9.70                   | 1.60E-06                            |
| GO:0010417     | glucuronoxylan biosynthetic process                    | 8.60                   | 0.03379                             |
| GO:0042761     | very long-chain fatty acid biosynthetic process        | 7.65                   | 0.02416                             |
| GO:0010192     | mucilage biosynthetic process                          | 7.65                   | 0.04446                             |
| GO:0019853     | L-ascorbic acid biosynthetic process                   | 7.34                   | 0.02416                             |
| GO:0018298     | protein-chromophore linkage                            | 6.80                   | 7.62E-06                            |
| GO:0009698     | phenylpropanoid metabolic process                      | 6.33                   | 0.02929                             |
| GO:2000022     | regulation of jasmonic acid mediated signaling pathway | 4.59                   | 0.03379                             |
| GO:0009644     | response to high light intensity                       | 3.79                   | 0.00677                             |
| GO:0009416     | response to light stimulus                             | 3.68                   | 7.62E-06                            |
| GO:0009809     | lignin biosynthetic process                            | 3.04                   | 0.02869                             |
| GO:0009753     | response to jasmonic acid                              | 2.87                   | 0.005374                            |
| GO:0016042     | lipid catabolic process                                | 2.39                   | 0.04446                             |
| GO:0009611     | response to wounding                                   | 2.13                   | 0.02416                             |
| GO:0055085     | transmembrane transport                                | 2.05                   | 0.02416                             |
| GO:0009409     | response to cold                                       | 1.89                   | 0.02929                             |
| GO:0046686     | response to cadmium ion                                | 1.84                   | 0.04472                             |

**Table S4.** Significantly enriched GO terms for genes up-regulated in *odoli*

| <b>GO term</b> | <b>description</b>                                         | <b>fold enrichment</b> | <b>FDR corrected <i>p</i> value</b> |
|----------------|------------------------------------------------------------|------------------------|-------------------------------------|
| GO:0051209     | release of sequestered calcium ion into cytosol            | 28.71                  | 0.002858                            |
| GO:0032959     | inositol trisphosphate biosynthetic process                | 28.71                  | 0.002858                            |
| GO:0010439     | regulation of glucosinolate biosynthetic process           | 19.14                  | 0.006935                            |
| GO:0048015     | phosphatidylinositol-mediated signaling                    | 14.35                  | 0.002858                            |
| GO:0048437     | floral organ development                                   | 14.35                  | 0.0148                              |
| GO:0005986     | sucrose biosynthetic process                               | 13.25                  | 0.01494                             |
| GO:0019344     | cysteine biosynthetic process                              | 10.77                  | 0.01689                             |
| GO:0006865     | amino acid transport                                       | 10.77                  | 0.01689                             |
| GO:0009228     | thiamine biosynthetic process                              | 10.13                  | 0.01898                             |
| GO:0007029     | endoplasmic reticulum organization                         | 9.07                   | 0.02343                             |
| GO:0005983     | starch catabolic process                                   | 8.51                   | 0.0148                              |
| GO:0000103     | sulfate assimilation                                       | 8.20                   | 0.02686                             |
| GO:0016114     | terpenoid biosynthetic process                             | 8.20                   | 0.02686                             |
| GO:0042594     | response to starvation                                     | 6.89                   | 0.03861                             |
| GO:0090351     | seedling development                                       | 6.38                   | 0.02067                             |
| GO:0048527     | lateral root development                                   | 4.63                   | 0.02414                             |
| GO:0010345     | suberin biosynthetic process                               | 4.59                   | 0.04542                             |
| GO:0009926     | auxin polar transport                                      | 4.47                   | 0.01689                             |
| GO:0051603     | proteolysis involved in cellular protein catabolic process | 3.56                   | 0.01689                             |
| GO:0010311     | lateral root formation                                     | 3.52                   | 0.03435                             |
| GO:0009553     | embryo sac development                                     | 3.38                   | 0.03861                             |
| GO:0009734     | auxin-activated signaling pathway                          | 3.24                   | 0.002858                            |
| GO:0009723     | response to ethylene                                       | 2.77                   | 0.01689                             |
| GO:0055085     | transmembrane transport                                    | 2.18                   | 0.01689                             |
| GO:0055114     | oxidation-reduction process                                | 1.69                   | 0.002858                            |

**Table S5.** Transcription factor regulatory targets of ODO1

| <b>Gene ID</b>         | <b><i>odoli</i><br/>log2 FC</b> | <b>Family</b> | <b>Name</b>   | <b><i>A. thaliana</i><br/>BLAST Homology</b> | <b>E Value</b> |
|------------------------|---------------------------------|---------------|---------------|----------------------------------------------|----------------|
| Peaxi162Scf00469g00624 | -4.60547                        | WRKY          | WRKY69        | AT3G58710                                    | 6.88E-65       |
| Peaxi162Scf00062g00421 | -1.62916                        | bHLH          | LRL1          | AT2G24260                                    | 2.13E-91       |
| Peaxi162Scf00235g00064 | -1.02638                        | ERF           | ERF3          | AT1G50640                                    | 4.15E-52       |
| Peaxi162Scf00362g00831 | -0.94635                        | MYB           | MYB4          | AT4G38620                                    | 8.1E-107       |
| Peaxi162Scf00052g01817 | -0.94528                        | bHLH          | PIL5          | AT2G20180                                    | 2.42E-78       |
| Peaxi162Scf00051g01410 | -0.86999                        | NAC           | ATAF1         | AT1G01720                                    | 1.1E-140       |
| Peaxi162Scf00002g00037 | -0.82842                        | MYB           | ODO1          | AT4G12350                                    | 8.23E-56       |
| Peaxi162Scf00102g00086 | -0.77596                        | Trihelix      | Myb/SANT-like | AT2G44730                                    | 4.92E-38       |
| Peaxi162Scf00848g00031 | 0.650685                        | GRAS          | SCL8          | AT5G52510                                    | 4E-143         |
| Peaxi162Scf02754g10013 | 0.99995                         | TALE          | BLH2          | AT4G36870                                    | 5E-134         |

**Table S6. Primer sequences**

| <b>gene</b>     | <b>type</b>           | <b>FW primer 5'-3'</b>    | <b>RV primer 5'-3'</b>        |
|-----------------|-----------------------|---------------------------|-------------------------------|
| <i>GFP-ODO1</i> | transgene integration | TCACATGGTCCTGCTG          | CCTGTTTCCAAGACGAGAATG         |
| <i>pODO1</i>    | cloning               | CCCAAGCTTGAAGGGGATCTCATG  | GGGGTACCCACTACTGACTCTCAGCTACC |
| <i>EPSPS1</i>   | qRT-PCR               | GCCTGATGTTGCCATGACAC      | TGCGCTCAGTTTCCTTGACT          |
| <i>4CLa</i>     | qRT-PCR               | ACAGTACCCAAATCTCCATCGG    | TGCCACCATCAGATTCCAAAC         |
| <i>PALb</i>     | qRT-PCR               | AGTTAGCACTGCAGGCATCA      | TGGGTGCCAATGGAGAACTT          |
| <i>PALc</i>     | qRT-PCR               | GCAACCCAGCAATTCGAAAC      | GACGCCTTCTCCTGTCAACA          |
| <i>CIMS</i>     | qRT-PCR               | CATCCGTACTIONCAGCTTGCCA   | TCAAGTTCAAAGAACACCGTCT        |
| <i>SAHH</i>     | qRT-PCR               | CTGGCTTGTAAGGACCCTCA      | AAAGCACCTCGACGAGAAGG          |
| <i>HCT2</i>     | qRT-PCR               | GCTCTTGTTTCGTGGTGCAC      | TCGACCCCAGCCAAAATCTG          |
| <i>CS</i>       | qRT-PCR               | AGCAAACCTGTGACGAGAGACA    | GGCTACCATTGCTTCAACCA          |
| <i>DHD-SDH3</i> | qRT-PCR               | TTCCTCCTTCTCCACTCGCT      | AATCACGATTTCGAGCTCCCC         |
| <i>CAD1</i>     | qRT-PCR               | TGAAAATCTGCTCTGCCTTAGA    | AATTGGGGACACTTGAGGAC          |
| <i>ODO1</i>     | qRT-PCR               | GTGCCTTAGCTTGCTTCTTTAGAGG | CCTTTTCTTTGTGGACCTTTTTGG      |
| <i>PPA-AT</i>   | qRT-PCR               | TTTGCCGATATTTGCTGGAT      | TTGCAAGGTCGAGAGTGATG          |
| <i>CSE</i>      | qRT-PCR               | GATACACTGGGAAGCCAAGG      | TCCCATGCACTGTCAAAAAG          |
| <i>EGS</i>      | qRT-PCR               | TGTTGTCTCCAATTCGCTCA      | CCGATAAGCGCTAAAACAGG          |
| <i>EF1a</i>     | qRT-PCR               | CCTGGTCAAATTGGAAACGG      | CAGATCGCCTGTCAATCTTGG         |
| <i>FBP1</i>     | qRT-PCR               | GACCTTGATCTACTTGGTGACGAC  | GTCACTTAAACGATAAGGTACACGAG    |
